# Supplementary material
Source: HighWire-hosted journal article supplement (http://www.jneurosci.org/highwire/filestream/600207/field_highwire_adjunct_files/7/Table_S2.pdf)
Supplement: Table_S2.pdf [file Table_S2.pdf]

**Table 1. Data summary of membrane properties of hippocampal neurons in culture**

|                                 | Current amplitude | n    | Resting membrane potential | n    | Trough voltage | n    | Steady-state voltage | n    | Sag voltage (through - steady-state) | n    | Sag ratio (steady-state / trough) | n    | Input resistance  | n    |
|---------------------------------|-------------------|------|----------------------------|------|----------------|------|----------------------|------|--------------------------------------|------|-----------------------------------|------|-------------------|------|
| Control (pooled)                | <b>128.6 pA</b>   | (25) | -63.6 mV                   | (16) | -94.0 mV       | (16) | <b>-83.2 mV</b>      | (16) | <b>8.0 mV</b>                        | (16) | <b>0.91</b>                       | (16) | <b>144.0 Mohm</b> | (16) |
| shRNA                           | <b>35.95 pA</b>   | (15) | -66.3 mV                   | (12) | -100.4 mV      | (12) | <b>-100.0 mV</b>     | (12) | <b>0.9 mV</b>                        | (11) | <b>0.99</b>                       | (12) | <b>196.9 Mohm</b> | (12) |
| Empty vector                    | 121.2 pA          | (7)  | -69.2 mV                   | (7)  | -100.8 mV      | (7)  | -89.8 mV             | (7)  | 5.9 mV                               | (7)  | 0.93                              | (7)  | 177.4 Mohm        | (7)  |
| shRNA control                   | 171.2 pA          | (6)  | -57.13 mV                  | (5)  | -84.5 mV       | (5)  | -76.9 mV             | (5)  | 7.6 mV                               | (5)  | 0.91                              | (5)  | 142.6 Mohm        | (5)  |
| Mann-Whitney (control vs shRNA) |                   |      |                            |      |                |      |                      |      |                                      |      |                                   |      |                   |      |
| p value                         | <b>0.002</b>      |      | 0.318                      |      | 0.318          |      | <b>0.035</b>         |      | <b>&lt;0.001</b>                     |      | <b>&lt;0.001</b>                  |      | <b>0.035</b>      |      |
